# Supplementary material for: The impact of prior SARS-CoV-2 infection on host inflammatory cytokine profiles in patients with TB or other respiratory diseases
Source: PubMed Central journal article supplement (PMC10764540; doi:10.3389/fimmu.2023.1292486), 2023-12-21
Supplement: DataSheet_1.pdf [file DataSheet_1.pdf]

*Supplementary Material*

**Figures**

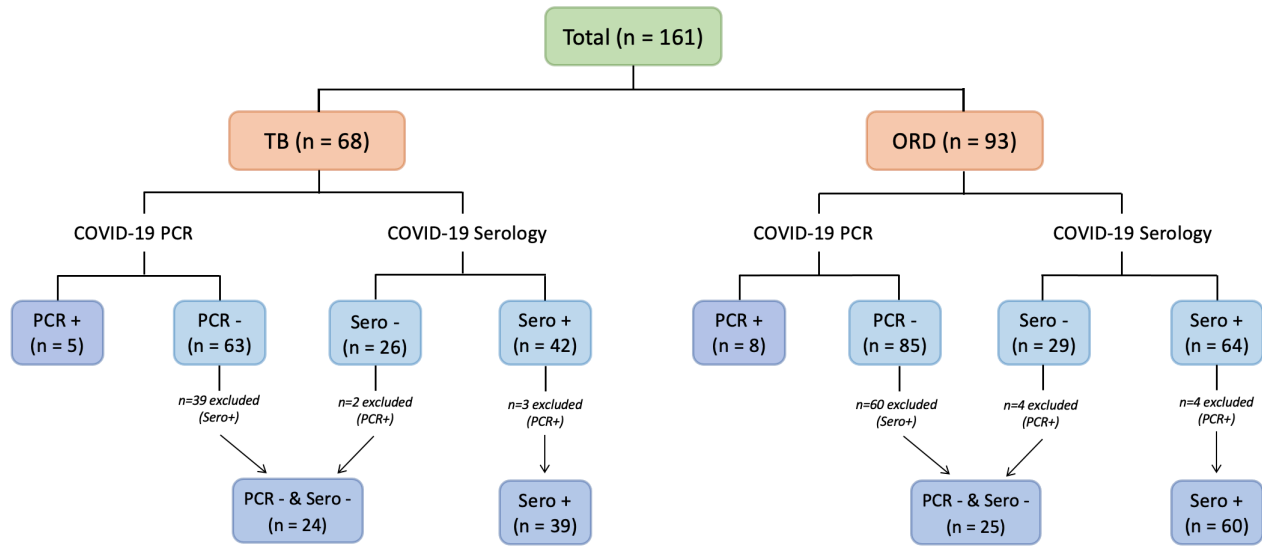

**Supplementary Figure 1. Flowchart of the study population.** All 161 participants were classified as having either TB or ORD, depending on their GeneXpert Ultra result or clinical diagnosis. Participants were then further divided according to their COVID-19 PCR and serology results.

## Tables

**Supplementary Table 1.** Median serum cytokine concentrations in TB patients with (Sero+) and without (Sero-) prior COVID-19 infection

| Cytokine       | Median concentration [IQR] in Sero- (pg/mL) | Median concentration [IQR] in Sero+ (pg/mL) | P-value       |
|----------------|---------------------------------------------|---------------------------------------------|---------------|
| Basic FGF      | 11.28 [9.9-13.2]                            | 10.12 [8.5-12.3]                            | 0.0597        |
| Eotaxin        | 16.37 [6.8-35.7]                            | 7.83 [2.4-18.1]                             | 0.0547        |
| G-CSF          | 84.64 [68.6-144.0]                          | 62.48 [37.5-96.0]                           | <b>0.0126</b> |
| IL-1 $\beta$   | 0.97 [0.24-1.28]                            | 0.14 [0.14-0.62]                            | <b>0.0022</b> |
| IL-4           | 2.04 [1.59-2.61]                            | 1.20 [0.94-1.69]                            | <b>0.0003</b> |
| IL-7           | 9.55 [2.9-16.4]                             | 1.89 [1.3-7.2]                              | <b>0.0003</b> |
| IL-8           | 9.65 [1.6-23.1]                             | 2.12 [1.0-7.0]                              | <b>0.0179</b> |
| IL-9           | 79.30 [16.6-171.7]                          | 33.04 [20.6-70.1]                           | 0.0524        |
| IL-13          | 0.53 [0.37-1.29]                            | 0.17 [0.17-0.50]                            | <b>0.0009</b> |
| IP-10          | 402.4 [104.7-1849]                          | 119.8 [32.49-436.3]                         | <b>0.0126</b> |
| MCP-1          | 2.04 [0.29-4.09]                            | 0.29 [0.29-2.38]                            | 0.0487        |
| MIP-1 $\alpha$ | 2.80 [1.39-5.53]                            | 1.93 [0.96-2.60]                            | 0.0385        |
| MIP-1 $\beta$  | 55.61 [17.0-80.2]                           | 30.62 [23.5-47.2]                           | 0.0529        |
| PDGF-BB        | 1465 [267.1-3418]                           | 483.6 [182.5-1051]                          | 0.0447        |
| RANTES         | 1989 [284.5-44758]                          | 596.4 [105.3-1705]                          | 0.0693        |
| TNF- $\alpha$  | 3.40 [1.68-9.38]                            | 1.68 [1.68-3.34]                            | <b>0.0166</b> |

*Note:* Sero+/- = seropositive/seronegative for SARS-CoV-2 antibodies; IQR = interquartile range. Significant differences ( $p \leq 0.035$ ) are in bold. Sero+ n=39; Sero- n=24.
